# Supplementary material
Source: MDPI journal article supplement (https://www.mdpi.com/2073-445X/7/4/158)
Supplement: s1 [file s1]

Archive with 2 entries (2 files):
- Supplementary 1_land-07-00158_Kongsager 2018.pdf
- Supplementary 2_land-07-00158_Kongsager 2018.pdf
